# Supplementary material for: Intimate genetic relationships and fungicide resistance in multiple strains of Aspergillus fumigatus isolated from a plant bulb
Source: PubMed Central journal article supplement (PMC9292267; doi:10.1111/1462-2920.15724), 2021-08-31

**A**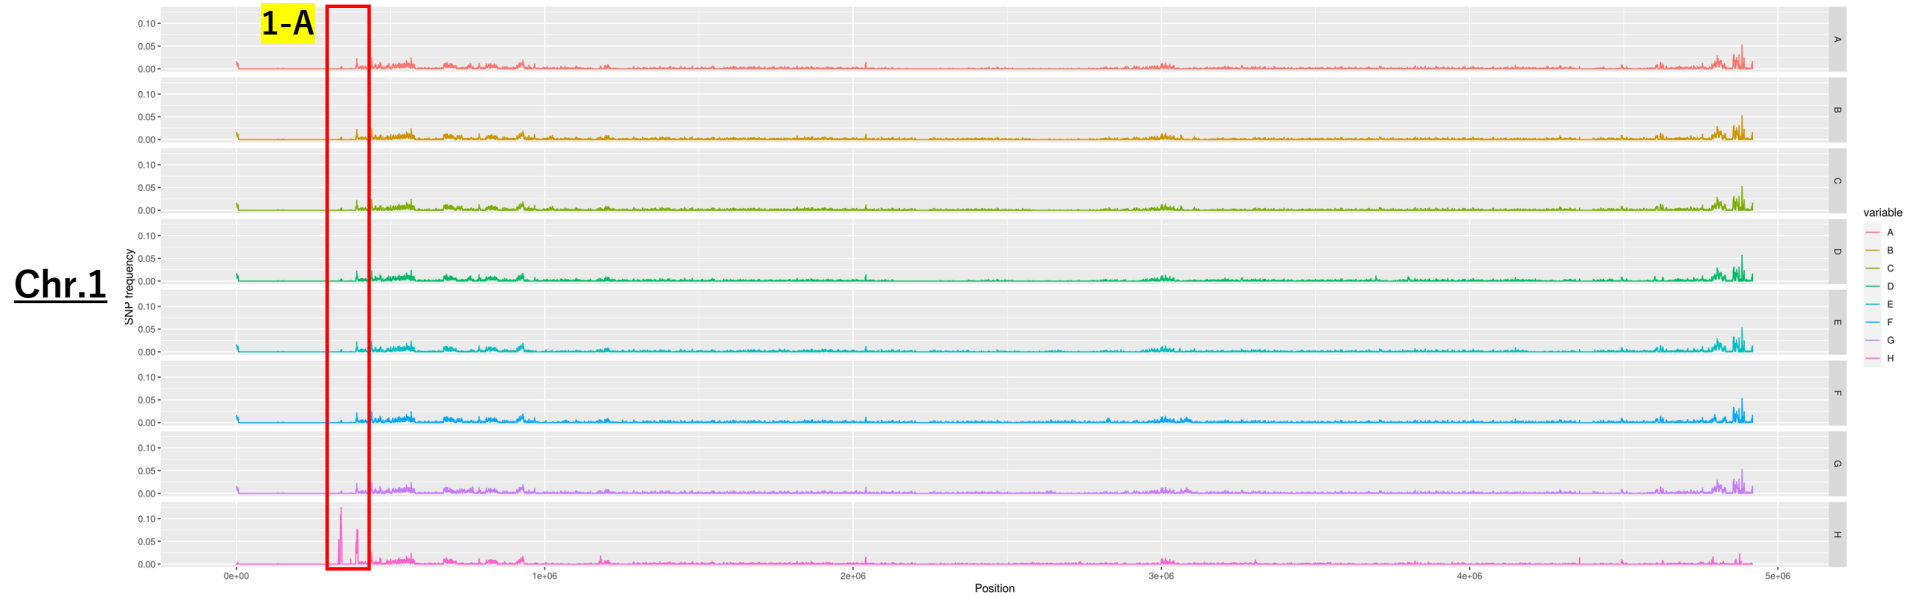**B**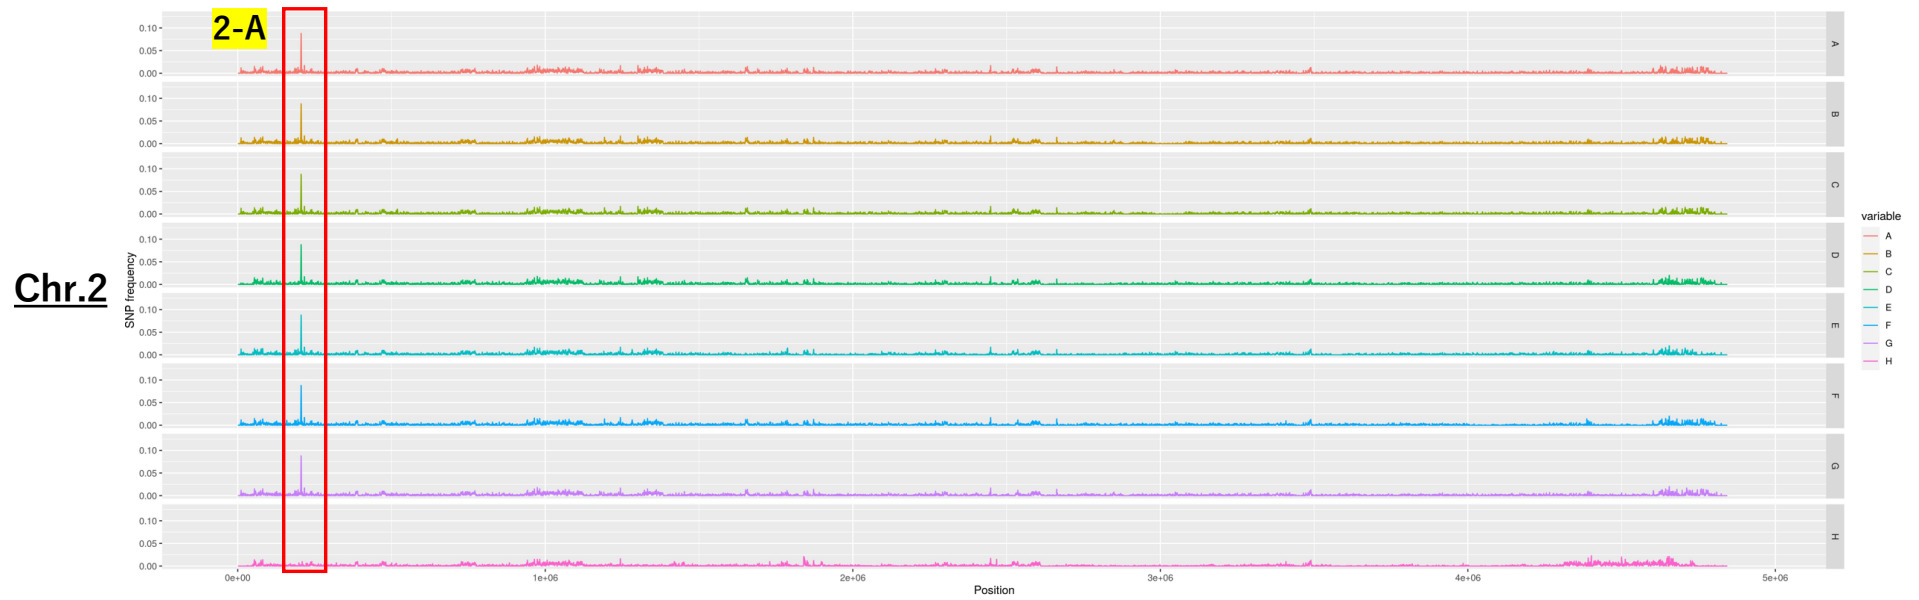

**C**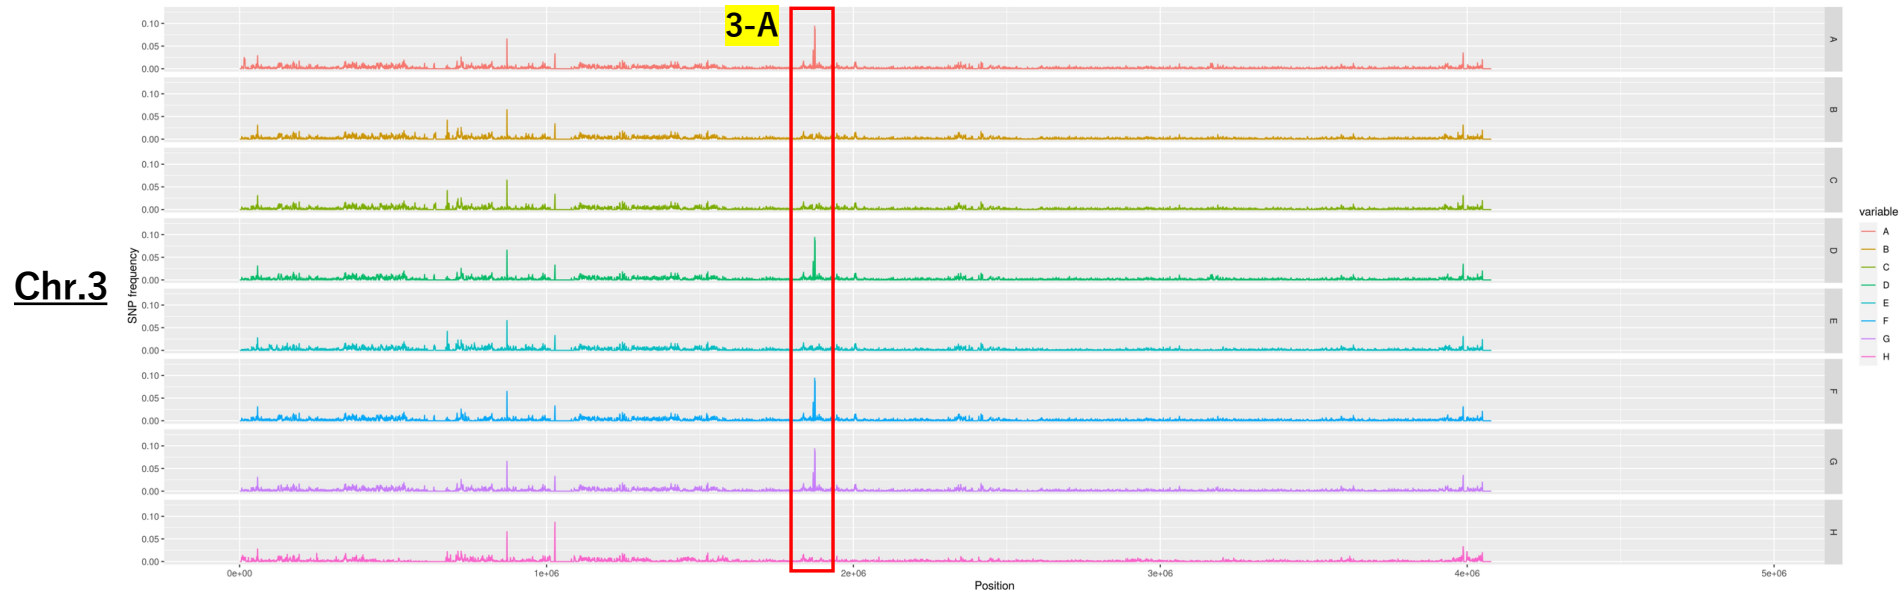**D**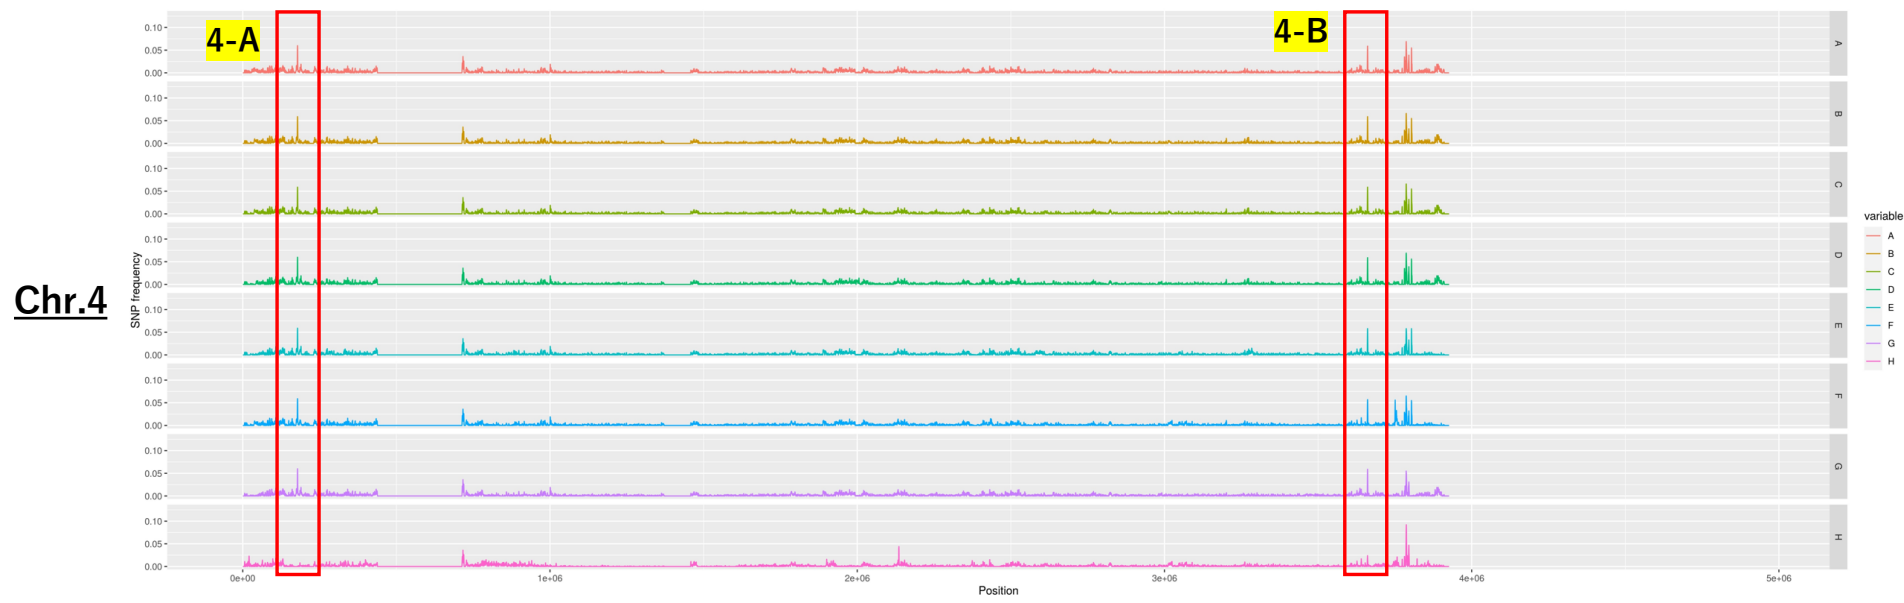

**E**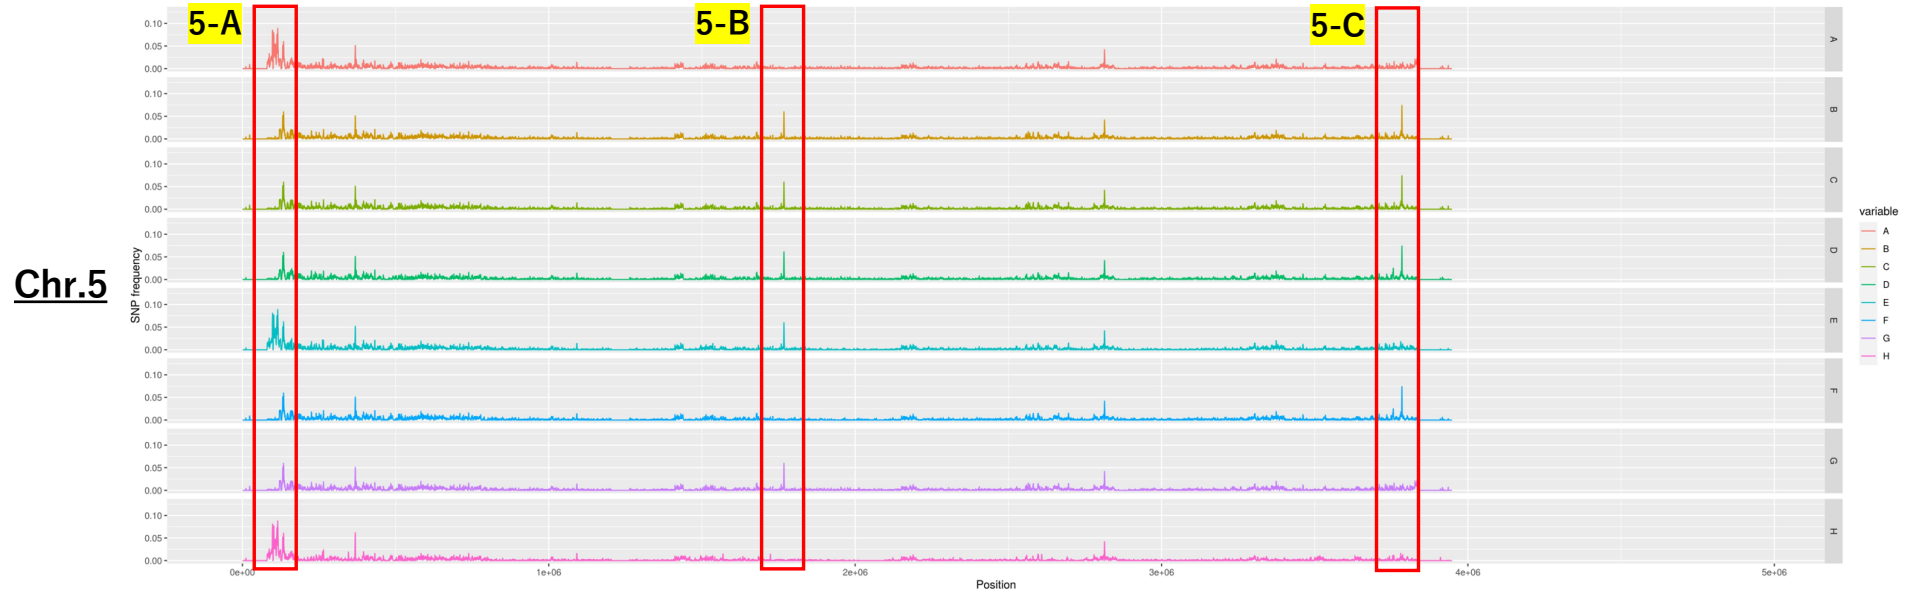**F**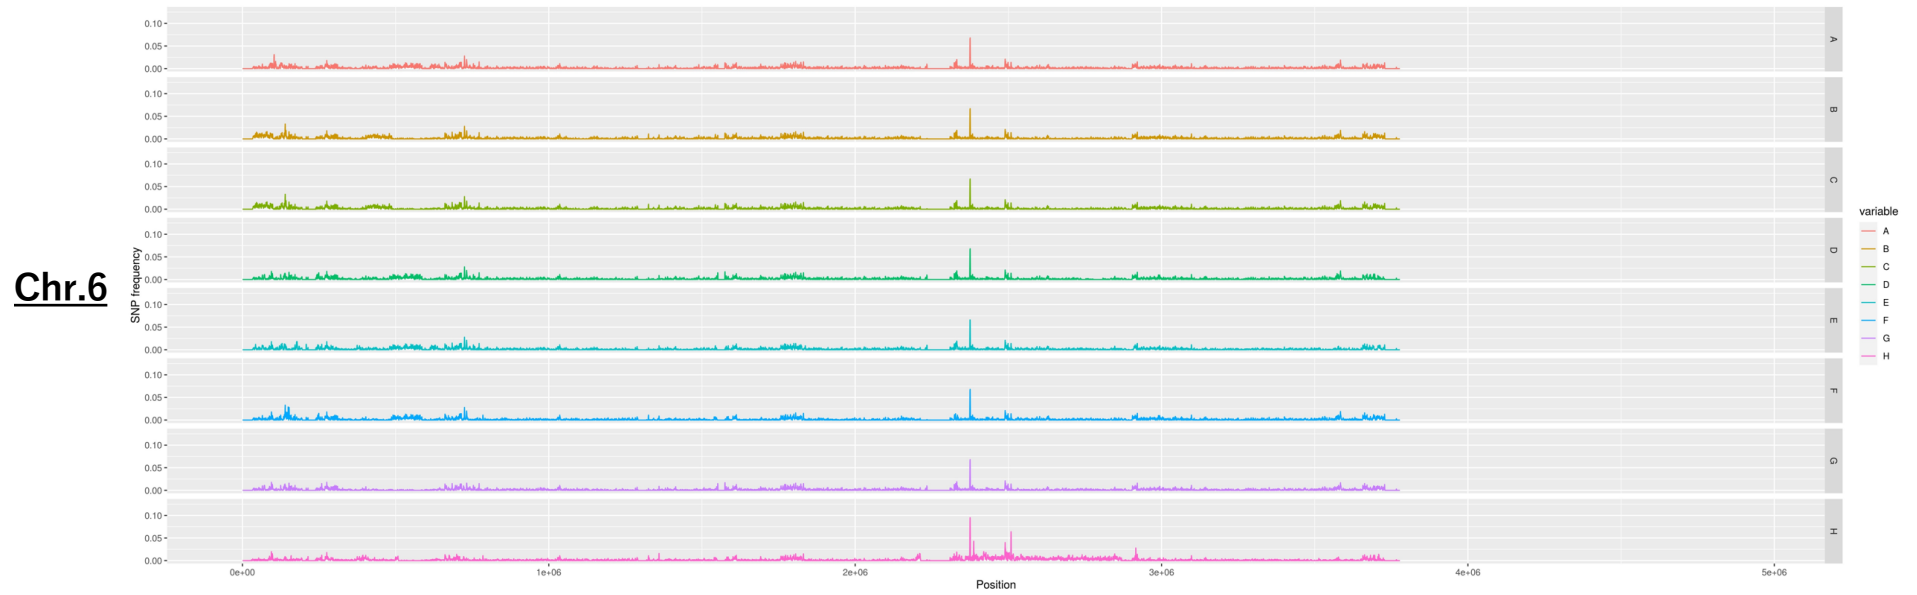

Supplement: EMI-23-5621-s002.pdf [file EMI-23-5621-s002.pdf]
